# Supplementary material for: Diagnosing dying: an integrative literature review
Source: PubMed Central journal article supplement — BMJ Support Palliat Care. 2014 Apr 29;4(3):263–70. doi: 10.1136/bmjspcare-2013-000621 (PMC4145438; doi:10.1136/bmjspcare-2013-000621), 2014-04-29
Supplement: bmjspcare-2013-000621-s1.pdf [file bmjspcare-2013-000621-s1.pdf]

**Supplementary Table 1: Characteristics of included studies**

**For references, please see main article.**

| <b>Country</b>   | <b>Research focus</b>                             | <b>Design &amp; methods</b>                  | <b>Population focus and setting</b>                          | <b>Key findings</b>                                                                                                                  | <b>Comments/implications</b>                                                                                                          |
|------------------|---------------------------------------------------|----------------------------------------------|--------------------------------------------------------------|--------------------------------------------------------------------------------------------------------------------------------------|---------------------------------------------------------------------------------------------------------------------------------------|
| [21]USA          | Care of patients in last week of life             | Systematic review (nos of papers not stated) | All research on med-line 1990-2004                           | Evidence of increased clinical intervention in the last weeks of life                                                                | Medline only data base searched                                                                                                       |
| [22]USA/ Canada  | Clinical practice in EoL care for ALS             | Retrospective chart/case review (n=1014)     | Patients who died with ALS in all care settings              | 10% did not have a peaceful death despite having advance directives in place. Respiratory symptoms, anxiety and pain were untreated. | Pain is not well recognised in ALS patients at the EoL                                                                                |
| [23]USA          | Application of the Palliative Performance scale   | Retrospective chart/case review (n=261)      | Patients seen by hospital PC service                         | Dyspnoea significant physical marker.<br><br>EoL more likely to be recognised in cancer patients                                     | PPS useful in describing mortality across a population but less so in predicting death in individuals                                 |
| [24]UK           | Quality of dying of head and neck cancer patients | Retrospective chart/case review (n=32)       | Patients registered with Head and Neck cancer service        | Insufficient recognition of psychosocial and spiritual issues at EoL                                                                 | Over half of patients needed emergency admission and absence of relatives at time of death indicates difficulties in diagnosing dying |
| [25] Netherlands | Problems and needs of glioma pts at EoL           | Retrospective chart/case review (n=58)       | Adult glioma pts at EoL at home and in hospital              | specific symptoms at the EoL; decreased consciousness, dysphagia, neurological deficit and seizures                                  | This group may need specific guidelines for EoL care                                                                                  |
| [26] Switzerland | Symptoms at EoL for stroke patients               | Retrospective chart/case review (n=42)       | Stroke pts (stroke unit) referred to PCT at the hospital     | Symptoms (dyspnoea & pain) in stroke patients underestimated                                                                         | EoL not recognised – communication issues                                                                                             |
| [27]Italy        | EoL issues in brain tumour patients               | Retrospective chart/case review (n=324)      | Brain tumour patients enrolled on home care programme        | Data on Clinical symptoms, palliative treatments and EoL treatment                                                                   | Decreased level of consciousness important and this group may need specific EoL guidelines.                                           |
| [28]UK           | Psychological, social and spiritual needs at EoL  | Qualitative longitudinal interview study     | Advanced lung (24) and heart failure (n=24) patients at home | As physical symptoms increase there is a parallel decline in social wellbeing.                                                       | Patients at EoL are likely to demonstrate significant psychosocial characteristics                                                    |
| [29]USA          | How staff recognise EoL                           | Qualitative interviews                       | Nursing home employees (n=42)                                | Physical, behavioural and social indicators are evident in the frail older person at EoL                                             | Comfort care may be viewed as palliative care in nursing homes                                                                        |
| [30]USA          | To explore PC needs of                            | Structured interviews                        | Staff and family                                             | Emotional symptoms, cleanliness and pain                                                                                             | Improved communication                                                                                                                |

|                                                                          |                                                                                                                |                                                             |                                                                                                                          |                                                                                                                                                                                |                                                                                                                                                               |
|--------------------------------------------------------------------------|----------------------------------------------------------------------------------------------------------------|-------------------------------------------------------------|--------------------------------------------------------------------------------------------------------------------------|--------------------------------------------------------------------------------------------------------------------------------------------------------------------------------|---------------------------------------------------------------------------------------------------------------------------------------------------------------|
|                                                                          | nursing home residents                                                                                         |                                                             | members of deceased nursing home residents (n=176)                                                                       | relief significant at EoL.                                                                                                                                                     | /ACP required                                                                                                                                                 |
| [31]Netherlands                                                          | Retrospective assessment of symptoms at EoL                                                                    | Quantitative (structured questionnaire)                     | Physicians actively practicing medicine from range of areas (n=85)                                                       | Physical symptoms treated more than psychosocial symptoms                                                                                                                      | Attention to psychosocial well-being and to the need to be with loved ones is essential at EoL                                                                |
| [32]UK                                                                   | End-of -life care for community dwelling older people with dementia (including those resident in care homes)   | Integrative literature review                               | Studies on palliative care for older people with dementia, 1985 - 2006 (67 papers included)                              | Health professionals are not skilled at recognizing the end stage in patients with dementia.                                                                                   | Research on end-of-life care for people with dementia has yet to develop interventions that address the particular challenges that dying with dementia poses. |
| [33] Belgium<br>Denmark<br>Italy<br>Netherlands<br>Sweden<br>Switzerland | Medical end of life decisions in expected deaths                                                               | Quantitative questionnaire to physicians of expected deaths | Reporting doctors                                                                                                        | Medical EoL decisions precede dying. Third of deaths were unexpected.                                                                                                          | End of life decision making was defined as those which may or may not hasten death                                                                            |
| [34] Germany                                                             | Medical & nursing practice at EoL                                                                              | Retrospective chart/case review                             | Acute Hospital staff (n=226)                                                                                             | Care decisions and interventions remained cure focussed                                                                                                                        | More cancer patients were considered to be dying than those with CV disease.                                                                                  |
| [35]Spain                                                                | To evaluate death circumstances in heart failure and dementia in two acute hospitals and caregiver's opinions. | Retrospective case review                                   | Record of deceased 102 patients aged over 64 with conclusive diagnosis, Telephone interviews with main caregiver (n=102) | Caregivers were satisfied with end of life care and two thirds of the patients with dementia had all non-palliative treatment withdrawn before death.                          | No system in place to avoid admission through A&E in the last stages of life                                                                                  |
| [36]USA                                                                  | Medicine residents approach to EoL care                                                                        | Qualitative interviews                                      | Medicine residents                                                                                                       | A 'cult of curability' was influential                                                                                                                                         | Junior physicians rely on worsening clinical condition as main reason for not being 'surprised' if patient dies                                               |
| [37]USA                                                                  | Adequacy of EoL care in hospital                                                                               | Retrospective chart/case review, focus groups & interviews  | Charts (n=61)<br>Focus groups with Drs and nurses 3x10)<br>Individual interviews with surviving                          | Nurses and physicians felt able to diagnose dying but this was not always communicated and 50% of relatives did not expect the death of their relative until very late stages. | Decision making was focused towards active treatment rather than EoL.                                                                                         |

|           |                                                                                                                                                       |                                                                     |                                                                                                                                                |                                                                                                                                                                                                                                                                                             |                                                                                                                                                                                      |
|-----------|-------------------------------------------------------------------------------------------------------------------------------------------------------|---------------------------------------------------------------------|------------------------------------------------------------------------------------------------------------------------------------------------|---------------------------------------------------------------------------------------------------------------------------------------------------------------------------------------------------------------------------------------------------------------------------------------------|--------------------------------------------------------------------------------------------------------------------------------------------------------------------------------------|
|           |                                                                                                                                                       |                                                                     | family member (N=31)                                                                                                                           |                                                                                                                                                                                                                                                                                             |                                                                                                                                                                                      |
| [38]Italy | Describe how Italian patients die in hospital                                                                                                         | Retrospective chart/case review and interviews                      | Data collection within 72 hours of death (n=270), interviews with senior nurses in charge at time of death and Drs to ascertain cause of death | Despite imminence of death patients were exposed to invasive treatments and lacked adequate symptom management including pain relief                                                                                                                                                        | Decision making was focused towards active treatment rather than EoL care.                                                                                                           |
| [39]USA   | To evaluate a physician led Comfort care programme                                                                                                    | Retrospective chart/case review following implementation of the CCP | Medical records of veterans in a 'Veterans Medical centre' (n=203)                                                                             | Increased documentation helped staff to better identify patients who were dying.                                                                                                                                                                                                            | EoL care can be introduced to units focussed on cure                                                                                                                                 |
| [40]UK    | To compare the experiences in the community in the last 3 months of life of older adults dying from cancer and non-cancer deaths.                     | Retrospective cross-sectional survey                                | Bereaved relatives (n=1,266) completed VOICES questionnaire.                                                                                   | Cancer patients received more health and social services in the last 3 months than non-cancer patients. Those dying from cancer were more aware that the patient was going to die soon and received support from a bereavement service. Older non cancer patients experienced disadvantage. | Those dying from non-cancer related deaths were less likely to be identified as dying, more likely to be moved in the last weeks of life and less likely to receive palliative care. |
| [41]UK    | To identify factors that enable or hinder clinicians identifying when a patient is dying, enabling implementation of the Liverpool Care Pathway (LCP) | Phenomenological study                                              | Semi-structured interviews (5 nurses and 5 doctors) involved in care of 6 patients who had been on LCP and 4 who had not been on LCP.          | Anxiety about getting the timing of diagnosing dying correct (potential barrier). Clinicians avoided difficult conversations with families which may lead to misunderstandings about the LCP.                                                                                               | Doctors tended to use more evidence (history and tests) and nurses used more intuition to diagnose dying, Specific communication skills training may help clinicians in this role.   |
| [42]UK    | Implementing an integrated care pathway for the last days of life as a way of developing quality end-of-life care in nursing                          | Action research                                                     | Summative evaluation of a 5-year action research project on 8 nursing homes.                                                                   | Six main barriers were identified: a lack of knowledge of PC drugs, symptom control at EoL, lack of preparation for approaching death; not knowing when someone is dying or understanding the                                                                                               | Quality end-of-life care in any nursing home depends on adequate staff, a culture of learning, motivation and management support.                                                    |

|        |                                                                                                                             |                                                                                                                   |                                                                                                    |                                                                                                                                                                                                                         |                                                                                                                         |
|--------|-----------------------------------------------------------------------------------------------------------------------------|-------------------------------------------------------------------------------------------------------------------|----------------------------------------------------------------------------------------------------|-------------------------------------------------------------------------------------------------------------------------------------------------------------------------------------------------------------------------|-------------------------------------------------------------------------------------------------------------------------|
|        | homes.                                                                                                                      |                                                                                                                   |                                                                                                    | dying process;<br>lack of MDT working in<br>nursing homes; lack<br>of confidence in<br>communicating about<br>dying                                                                                                     |                                                                                                                         |
| [43]UK | To implement<br>an ICP in an<br>inpatient<br>hospice setting<br>in order to set<br>standards for<br>care at end of<br>life. | Case review<br>of all<br>patients<br>placed on<br>ICP in one<br>care centre<br>between Feb<br>1997 & Feb<br>1998. | Review of<br>case records<br>( N = 168)<br>for one year<br>(1997-8) for<br>all patients<br>on LCP. | The introduction of ICP<br>documentation is a<br>'cultural change' in an<br>organisation and takes<br>time to be accepted by<br>staff.<br><br>Symptom control<br>achieved in 85% of<br>cases of patients on the<br>ICP. | The ICP entry<br>criteria are<br>appropriate for<br>cancer<br>populations but<br>not tested in non-<br>malignant cases. |
